# Supplementary material for: MRMCsamplesize: An R Package for Estimating Sample Sizes for Multi-Reader Multi-Case Studies
Source: bioRxiv or medRxiv preprint supplement (doi:10.1101/2023.09.25.23296069), 2023-09-25
Supplement: Supplementary file [file media-1.pdf]

## Validation Results

- Small, moderate and large reader variabilities correspond to variations in intra- and inter-reader variability ranges and were defined as per the definitions in the reference literature (Obuchowski 2000).

| Variability | Inter-reader variability range, $range_b$ | Intra-reader variability range, $range_w$ |
|-------------|-------------------------------------------|-------------------------------------------|
| Small       | 0.01                                      | 0.005                                     |
| Moderate    | 0.05                                      | 0.025                                     |
| Large       | 0.10                                      | 0.05                                      |

- Table 1, Table 2 and Table 3 contains the results when number of readers is assumed to be 4, 6 and 10 respectively in the MRMC study. Within each table, a different number of scenarios were modelled by varying AUC, effect size and ratio of non-diseased to diseased cases.
- The '*Reference Sample Size*' field in the table shows the number of cases from the reference literature and the '*R Output Sample Size*' shows the number of cases obtained from the *MRMCsamplesize* package together with percentage difference from the reference sample size.
- All calculations assumed a power of 80% and a type 1 error rate of 5%.
- When the number of diseased cases required turned out to be <10, a minimum of 10 diseased cases was assigned to that scenario because it is not recommended to conduct an MRMC study with anything less than that.
- An overestimation by >5% or underestimation by >1% are coloured red.
- The R script to reproduce the 'R output Sample Size' estimates in Table 1, Table 2 and Table 3 are available here:  
<https://github.com/technOslerphile/MRMCsamplesize/blob/master/S1.R>

**Table 1**

|             |                     |           | Number of Readers (J) = 4 |                               |                             |                               |                          |                               |
|-------------|---------------------|-----------|---------------------------|-------------------------------|-----------------------------|-------------------------------|--------------------------|-------------------------------|
|             |                     |           | Small Reader Variability  |                               | Moderate Reader Variability |                               | Large Reader Variability |                               |
| AUC (theta) | Effect Size (delta) | Ratio (R) | Reference Sample Size     | R Output Sample Size (% Diff) | Reference Sample Size       | R Output Sample Size (% Diff) | Reference Sample Size    | R Output Sample Size (% Diff) |
| 0.75        | 5%                  | 1         | 571                       | 568 (-0.53%)                  |                             |                               |                          |                               |
|             |                     | 2         | 679                       | 675 (-0.59%)                  |                             |                               |                          |                               |
|             |                     | 4         | 983                       | 980 (-0.31%)                  |                             |                               |                          |                               |
|             | 10%                 | 1         | 133                       | 134 (0.75%)                   | 291                         | 290 (-0.34%)                  |                          |                               |
|             |                     | 2         | 159                       | 159 (0%)                      | 345                         | 345 (0%)                      |                          |                               |
|             |                     | 4         | 229                       | 230 (0.44%)                   | 500                         | 500 (0%)                      |                          |                               |
|             | 15%                 | 1         | 59                        | 60 (1.69%)                    | 77                          | 78 (1.3%)                     | 2975                     | 2912 (-2.12%)                 |
|             |                     | 2         | 70                        | 72 (2.86%)                    | 92                          | 93 (1.09%)                    | 3536                     | 3462 (-2.09%)                 |
|             |                     | 4         | 101                       | 100 (-0.99%)                  | 132                         | 135 (2.27%)                   | 5122                     | 5015 (-2.09%)                 |
| 0.90        | 5%                  | 1         | 287                       | 290 (1.05%)                   |                             |                               |                          |                               |
|             |                     | 2         | 363                       | 366 (0.83%)                   |                             |                               |                          |                               |
|             |                     | 4         | 548                       | 550 (0.36%)                   |                             |                               |                          |                               |
|             | 10%                 | 1         | 67                        | 68 (1.49%)                    | 146                         | 148 (1.37%)                   |                          |                               |
|             |                     | 2         | 85                        | 87 (2.35%)                    | 185                         | 186 (0.54%)                   |                          |                               |
|             |                     | 4         | 128                       | 130 (1.56%)                   | 279                         | 280 (0.36%)                   |                          |                               |
|             | 15%                 | 1         | 30                        | 30 (0%)                       | 39                          | 40 (2.56%)                    | 1497                     | 1478 (-1.27%)                 |
|             |                     | 2         | 38                        | 39 (2.63%)                    | 49                          | 51 (4.08%)                    | 1890                     | 1869 (-1.11%)                 |
|             |                     | 4         | 57                        | 60 (5.26%)                    | 74                          | 75 (1.35%)                    | 2856                     | 2820 (-1.26%)                 |

**Reference**

- Obuchowski NA. Sample size tables for receiver operating characteristic studies. AJR Am J Roentgenol. 2000 Sep;175(3):603-8. doi: 10.2214/ajr.175.3.1750603. PMID: 10954438.

Table 2

| Number of Readers (J) = 6 |  |  |                          |  |                             |  |                          |  |
|---------------------------|--|--|--------------------------|--|-----------------------------|--|--------------------------|--|
|                           |  |  | Small Reader Variability |  | Moderate Reader Variability |  | Large Reader Variability |  |

| AUC (theta) | Effect Size (delta) | Ratio (R) | Reference Sample Size | R Output Sample Size (% Diff) | Reference Sample Size | R Output Sample Size (% Diff) | Reference Sample Size | R Output Sample Size (% Diff) |
|-------------|---------------------|-----------|-----------------------|-------------------------------|-----------------------|-------------------------------|-----------------------|-------------------------------|
| 0.75        | 5%                  | 1         | 246                   | 246 (0%)                      | 3769                  | 3694 (-1.99%)                 |                       |                               |
|             |                     | 2         | 293                   | 291 (-0.68%)                  | 4479                  | 4392 (-1.94%)                 |                       |                               |
|             |                     | 4         | 424                   | 425 (0.24%)                   | 6488                  | 6360 (-1.97%)                 |                       |                               |
|             | 10%                 | 1         | 60                    | 60 (0%)                       | 78                    | 78 (0%)                       | 943                   | 924 (-2.01%)                  |
|             |                     | 2         | 71                    | 72 (1.41%)                    | 92                    | 93 (1.09%)                    | 1120                  | 1098 (-1.96%)                 |
|             |                     | 4         | 103                   | 105 (1.94%)                   | 133                   | 135 (1.5%)                    | 1622                  | 1590 (-1.97%)                 |
|             | 15%                 | 1         | 27                    | 28 (3.7%)                     | 30                    | 30 (0%)                       | 46                    | 46 (0%)                       |
|             |                     | 2         | 32                    | 33 (3.13%)                    | 35                    | 36 (2.86%)                    | 54                    | 54 (0%)                       |
|             |                     | 4         | 50                    | 50 (0%)                       | 51                    | 55 (7.84%)                    | 78                    | 80 (2.56%)                    |
| 0.90        | 5%                  | 1         | 124                   | 126 (1.61%)                   | 1896                  | 1876 (-1.05%)                 |                       |                               |
|             |                     | 2         | 157                   | 159 (1.27%)                   | 2395                  | 2370 (-1.04%)                 |                       |                               |
|             |                     | 4         | 236                   | 240 (1.69%)                   | 3618                  | 3580 (-1.05%)                 |                       |                               |
|             | 10%                 | 1         | 31                    | 32 (3.23%)                    | 39                    | 40 (2.56%)                    | 474                   | 470 (-0.84%)                  |
|             |                     | 2         | 38                    | 39 (2.63%)                    | 50                    | 51 (2%)                       | 599                   | 594 (-0.83%)                  |
|             |                     | 4         | 58                    | 60 (3.45%)                    | 75                    | 75 (0%)                       | 905                   | 895 (-1.1%)                   |
|             | 15%                 | 1         | 20                    | 20 (0%)                       | 20                    | 20 (0%)                       | 23                    | 24 (4.35%)                    |
|             |                     | 2         | 30                    | 30 (0%)                       | 30                    | 30 (0%)                       | 30                    | 30 (0%)                       |
|             |                     | 4         | 50                    | 50 (0%)                       | 50                    | 50 (0%)                       | 50                    | 50 (0%)                       |

Reference

- Obuchowski NA. Sample size tables for receiver operating characteristic studies. AJR Am J Roentgenol. 2000 Sep;175(3):603-8. doi: 10.2214/ajr.175.3.1750603. PMID: 10954438.

Table 3

**Number of Readers (J) = 10**

| Small Reader Variability | Moderate Reader Variability | Large Reader Variability |
|--------------------------|-----------------------------|--------------------------|
|--------------------------|-----------------------------|--------------------------|

| AUC (theta) | Minimum Detectable Effect Size (delta) | Ratio (R) | Reference Sample Size | R Output Sample Size (% Diff) | Reference Sample Size | R Output Sample Size (% Diff) | Reference Sample Size | R Output Sample Size (% Diff) |  |
|-------------|----------------------------------------|-----------|-----------------------|-------------------------------|-----------------------|-------------------------------|-----------------------|-------------------------------|--|
| <b>0.75</b> | <b>5%</b>                              | 1         | 116                   | 116 (0%)                      | 201                   | 200 (-0.5%)                   |                       |                               |  |
|             |                                        | 2         | 138                   | 138 (0%)                      | 239                   | 240 (0.42%)                   |                       |                               |  |
|             |                                        | 4         | 200                   | 200 (0%)                      | 345                   | 345 (0%)                      |                       |                               |  |
|             | <b>10%</b>                             | 1         | 29                    | 30 (3.45%)                    | 32                    | 32 (0%)                       | 51                    | 50 (-1.96%)                   |  |
|             |                                        | 2         | 35                    | 36 (2.86%)                    | 38                    | 39 (2.63%)                    | 60                    | 60 (0%)                       |  |
|             |                                        | 4         | 50                    | 50 (0%)                       | 55                    | 55 (0%)                       | 87                    | 90 (3.45%)                    |  |
|             | <b>15%</b>                             | 1         | 20                    | 20 (0%)                       | 20                    | 20 (0%)                       | 20                    | 20 (0%)                       |  |
|             |                                        | 2         | 30                    | 30 (0%)                       | 30                    | 30 (0%)                       | 30                    | 30 (0%)                       |  |
|             |                                        | 4         | 50                    | 50 (0%)                       | 50                    | 50 (0%)                       | 50                    | 50 (0%)                       |  |
|             | <b>0.90</b>                            | <b>5%</b> | 1                     | 59                            | 60 (1.69%)            | 101                           | 102 (0.99%)           |                               |  |
|             |                                        |           | 2                     | 74                            | 75 (1.35%)            | 128                           | 129 (0.78%)           |                               |  |
|             |                                        |           | 4                     | 112                           | 115 (2.68%)           | 193                           | 195 (1.04%)           |                               |  |
| <b>10%</b>  |                                        | 1         | 20                    | 20 (0%)                       | 20                    | 20 (0%)                       | 26                    | 26 (0%)                       |  |
|             |                                        | 2         | 30                    | 30 (0%)                       | 30                    | 30 (0%)                       | 32                    | 33 (3.13%)                    |  |
|             |                                        | 4         | 50                    | 50 (0%)                       | 50                    | 50 (0%)                       | 50                    | 50 (0%)                       |  |
| <b>15%</b>  |                                        | 1         | 20                    | 20 (0%)                       | 20                    | 20 (0%)                       | 20                    | 20 (0%)                       |  |
|             |                                        | 2         | 30                    | 30 (0%)                       | 30                    | 30 (0%)                       | 30                    | 30 (0%)                       |  |
|             |                                        | 4         | 50                    | 50 (0%)                       | 50                    | 50 (0%)                       | 50                    | 50 (0%)                       |  |

**Reference**

- Obuchowski NA. Sample size tables for receiver operating characteristic studies. AJR Am J Roentgenol. 2000 Sep;175(3):603-8. doi: 10.2214/ajr.175.3.1750603. PMID: 10954438.
